# Supplementary material for: Comparative assessments of VOC emission rates and associated health risks from wastewater treatment processes
Source: Royal Society of Chemistry journal article supplement (doi:10.1039/c2em30138e), 2012-01-01
Supplement: c2em30138e.pdf [file c2em30138e.pdf]

## Comparative Assessments of VOC Emission Rates and the Associated Health

### Risks from Wastewater Treatment Processes

Wen-Ben Yang<sup>1</sup>, Wei-Hsiang Chen<sup>1\*</sup>, Chung-Shin Yuan<sup>1, 2\*</sup>, Jun-Chen Yang<sup>2</sup>,  
Qing-Liang Zhao<sup>2</sup>

### Electronic Supplementary Information

(5 tables included)

Submitted to *Journal of Environmental Monitoring*

July 17, 2012

1. Institute of Environmental Engineering, National Sun Yat-Sen University,  
Kaohsiung 804, Taiwan, R.O.C.
2. State Key Laboratory of Urban Water Resources and Environments  
(SKLUWRE), Harbin Institute of Technology, Harbin 150090, China

**\*Corresponding author: Corresponding authors:** Wei-Hsiang Chen, Tel: +886 7  
5252000 ext 4421; E-mail address: [whchen@mail.nsysu.edu.tw](mailto:whchen@mail.nsysu.edu.tw) Chung-Shin Yuan,  
Tel.: +886 7 5252000 ext 4417; E-mail address: [yicsngi@mail.nsysu.edu.tw](mailto:yicsngi@mail.nsysu.edu.tw)

Table S1. Selected physicochemical properties of the VOCs considered in this study

| Chemical                | Melting points<br>(°C) | Boiling point<br>(°C) | Water solubility<br>(g/L) | Octanol-water<br>partition<br>coefficient<br>(dimensionless) |
|-------------------------|------------------------|-----------------------|---------------------------|--------------------------------------------------------------|
| Benzene                 | 6                      | 80                    | 1.8                       | 2.13                                                         |
| Toluene                 | -93                    | 111                   | 0.53                      | 2.69                                                         |
| Xylene                  | -34                    | 137-140               | < 0.1                     | 3.12                                                         |
| Carbon<br>tetrachloride | -23                    | 77                    | 0.8                       | 2.64                                                         |
| Chloroform              | -64                    | 61                    | 8                         | 1.97                                                         |
| Trichloroethylene       | -73                    | 87                    | 1                         | 2.42                                                         |
| Perchloroethylene       | -19                    | 121                   | 0.15                      | 3.4                                                          |

1.

Table S2. The VOC species identified in different treatment processes of the wastewater treatment plant investigated in this study

| Processes                                    | The VOC species                               |                                                                       |
|----------------------------------------------|-----------------------------------------------|-----------------------------------------------------------------------|
|                                              | General <sup>1</sup>                          | Additional <sup>1</sup>                                               |
| Bar screen                                   | C1-C12, Aromatic and chlorinated hydrocarbons | Indole, Dimethyl disulphide                                           |
| Aerated grit chamber                         |                                               | Methylene chloride, Naphthalene                                       |
| Primary sedimentation basins                 |                                               | 2-chloro-1,3-butadiene                                                |
| Anaerobic sludge treatment process           |                                               | Vinyl chloride                                                        |
| Aerobic sludge treatment process (forepart)  |                                               | 1-aminopentylane, volatile fatty acids, phthalic acid                 |
| Aerobic sludge treatment process (rear part) |                                               | 1-aminopentylane, nitropentylane, volatile fatty acids, phthalic acid |
| Secondary sedimentation basins               |                                               | 1-aminopentylane, nitropentylane phthalic acid                        |

1. General and additional denote the VOC species observed in all processes and those found in each specific treatment processes, respectively.

Table S3. Estimated dimensionless Henry's constants of the VOCs of interest in this study

| Substance            | Spring | Summer | Fall  | Winter |
|----------------------|--------|--------|-------|--------|
| Benzene              | 4.18   | 4.33   | 9.80  | 9.59   |
| Toluene              | 3.25   | 3.36   | 7.62  | 7.46   |
| Xylene               | 3.25   | 3.36   | 7.62  | 7.46   |
| Carbon tetrachloride | 5.80   | 6.01   | 13.61 | 13.32  |
| Chloroform           | 0.81   | 0.84   | 1.91  | 1.87   |
| Trichloroethylene    | 2.32   | 2.40   | 5.44  | 5.33   |
| Perchloroethylene    | 1.28   | 1.32   | 2.99  | 2.93   |

Table S4. The concentrations of VOCs (mg/L) measured in the gas phase of different treatment processes in the wastewater treatment plant in this study

| Season | Species                        | Bar Screen | Primary sedimentation | Anaerobic sludge | Aerobic sludge |      | Secondary sedimentation |
|--------|--------------------------------|------------|-----------------------|------------------|----------------|------|-------------------------|
|        |                                |            |                       |                  | Forepart       | Rear |                         |
| Spring | Benzene                        | 64         | 79                    | 65               | 55             | 42   | 36                      |
|        | Toluene                        | 72         | 96                    | 22               | 17             | ND   | ND                      |
|        | Xylene                         | 117        | 167                   | ND               | ND             | ND   | ND                      |
|        | CHCl <sub>3</sub> <sup>1</sup> | 17.0       | 19.6                  | 13.0             | 16.0           | 17.0 | 15.8                    |
|        | CCl <sub>4</sub> <sup>1</sup>  | 11.0       | 9.8                   | 8.8              | 8.9            | 10.2 | ND                      |
|        | TCE <sup>1</sup>               | 0.4        | 0.5                   | 0.2              | 0.3            | 0.3  | 0.5                     |
|        | PCE <sup>1</sup>               | ND         | ND                    | ND               | ND             | ND   | ND                      |
| Summer | Benzene                        | 69         | 83                    | 70               | 57             | 48   | 34                      |
|        | Toluene                        | 75         | 99                    | 25               | 19             | ND   | ND                      |
|        | Xylene                         | 117        | 112                   | 99               | ND             | ND   | ND                      |
|        | CHCl <sub>3</sub> <sup>1</sup> | 18.5       | 23.4                  | 14.6             | 16.8           | 17.7 | 16.4                    |
|        | CCl <sub>4</sub> <sup>1</sup>  | 13.2       | 11.2                  | 7.8              | 10.3           | 10.2 | 11.1                    |
|        | TCE <sup>1</sup>               | 0.4        | 0.5                   | 0.2              | 0.3            | 0.4  | 0.6                     |
|        | PCE <sup>1</sup>               | ND         | ND                    | ND               | ND             | ND   | ND                      |
| Fall   | Benzene                        | 59         | 77                    | 59               | 51             | 40   | 35                      |
|        | Toluene                        | 71         | 88                    | 21               | 13             | ND   | ND                      |
|        | Xylene                         | 112        | 141                   | ND               | ND             | ND   | ND                      |
|        | CHCl <sub>3</sub> <sup>1</sup> | 15.5       | 16.4                  | 11.7             | 14.0           | 15.0 | 15.2                    |
|        | CCl <sub>4</sub> <sup>1</sup>  | 8.9        | 8.7                   | 5.6              | 7.7            | 7.8  | 8.9                     |
|        | TCE <sup>1</sup>               | 0.4        | 0.4                   | 0.2              | 0.3            | 0.3  | 0.5                     |
|        | PCE <sup>1</sup>               | ND         | ND                    | ND               | ND             | ND   | ND                      |
| Winter | Benzene                        | 56         | 70                    | 56               | 49             | 38   | 33                      |
|        | Toluene                        | 70         | 86                    | 20               | 10             | ND   | ND                      |
|        | Xylene                         | 99         | 149                   | ND               | ND             | ND   | N                       |
|        | CHCl <sub>3</sub> <sup>1</sup> | 14.9       | 16.1                  | 8.9              | 13.0           | 13.5 | 12.5                    |
|        | CCl <sub>4</sub> <sup>1</sup>  | 8.2        | 7.9                   | 4.9              | 7.4            | 7.6  | 7.5                     |
|        | TCE <sup>1</sup>               | 0.4        | 0.4                   | 0.2              | 0.2            | 0.2  | 0.4                     |
|        | PCE <sup>1</sup>               | ND         | ND                    | ND               | ND             | ND   | ND                      |

1. CHCl<sub>3</sub>, CCl<sub>4</sub>, TCE, and PCE represent chloroform, carbon tetrachloride, trichloroethylene, and perchloroethylene, respectively.
2. ND denotes non-detected.

Table S5. The concentrations of VOCs (mg/L) measured in the water phase of different treatment processes

| Season | Species                        | Bar Screen | Primary sedimentation | Anaerobic sludge | Aerobic sludge  |      | Secondary sedimentation |
|--------|--------------------------------|------------|-----------------------|------------------|-----------------|------|-------------------------|
|        |                                |            |                       |                  | Forepart        | Rear |                         |
| Spring | Benzene                        | 0.16       | 0.22                  | 0.20             | 0.16            | 0.07 | 0.05                    |
|        | Toluene                        | 0.12       | 0.10                  | 0.07             | ND              | ND   | ND                      |
|        | Xylene                         | 0.50       | 0.70                  | 0.18             | 0.02            | ND   | ND                      |
|        | CHCl <sub>3</sub> <sup>1</sup> | 0.04       | 0.04                  | 0.03             | 0.02            | 0.02 | 0.02                    |
|        | CCl <sub>4</sub> <sup>1</sup>  | 0.42       | 0.34                  | 0.29             | 0.25            | 0.26 | 0.23                    |
|        | TCE <sup>1</sup>               | 2.10       | 1.75                  | 1.65             | 1.10            | 1.30 | 1.20                    |
|        | PCE <sup>1</sup>               | 0.67       | 0.75                  | 0.65             | 0.58            | 0.56 | 0.53                    |
| Summer | Benzene                        | 0.15       | 0.25                  | 0.17             | 0.13            | ND   | ND                      |
|        | Toluene                        | 0.10       | 0.06                  | 0.05             | ND <sup>1</sup> | ND   | ND                      |
|        | Xylene                         | 0.44       | 0.66                  | 0.14             | ND <sup>1</sup> | ND   | ND                      |
|        | CHCl <sub>3</sub> <sup>1</sup> | 0.04       | 0.04                  | 0.03             | 0.02            | 0.02 | 0.02                    |
|        | CCl <sub>4</sub> <sup>1</sup>  | 0.40       | 0.32                  | 0.25             | 0.23            | 0.20 | 0.20                    |
|        | TCE <sup>1</sup>               | 1.80       | 1.60                  | 1.50             | 1.00            | 1.10 | 1.10                    |
|        | PCE <sup>1</sup>               | 0.61       | 0.60                  | 0.58             | 0.56            | 0.54 | 0.51                    |
| Fall   | Benzene                        | 0.19       | 0.28                  | 0.22             | 0.18            | 0.08 | 0.07                    |
|        | Toluene                        | 0.14       | 0.13                  | 0.04             | 0.03            | 0.10 | ND                      |
|        | Xylene                         | 0.52       | 0.72                  | 0.16             | 0.02            | 0.02 | ND                      |
|        | CHCl <sub>3</sub> <sup>1</sup> | 0.04       | 0.04                  | 0.04             | 0.02            | 0.03 | 0.02                    |
|        | CCl <sub>4</sub> <sup>1</sup>  | 0.45       | 0.37                  | 0.31             | 0.27            | 0.26 | 0.24                    |
|        | TCE <sup>1</sup>               | 2.35       | 2.00                  | 1.75             | 1.15            | 1.40 | 1.30                    |
|        | PCE <sup>1</sup>               | 0.79       | 0.78                  | 0.70             | 0.61            | 0.58 | 0.56                    |
| Winter | Benzene                        | 0.20       | 0.30                  | 0.27             | 0.20            | 0.13 | 0.08                    |
|        | Toluene                        | 0.16       | 0.14                  | 0.08             | 0.04            | 0.02 | ND                      |
|        | Xylene                         | 0.62       | 0.82                  | 0.17             | 0.04            | 0.03 | ND                      |
|        | CHCl <sub>3</sub> <sup>1</sup> | 0.05       | 0.05                  | 0.04             | 0.02            | 0.02 | 0.03                    |
|        | CCl <sub>4</sub> <sup>1</sup>  | 0.05       | 0.38                  | 0.33             | 0.29            | 0.28 | 0.27                    |
|        | TCE <sup>1</sup>               | 2.45       | 2.20                  | 1.90             | 1.23            | 1.50 | 1.40                    |
|        | PCE <sup>1</sup>               | 0.85       | 0.80                  | 0.75             | 0.64            | 0.64 | 0.57                    |

1. CHCl<sub>3</sub>, CCl<sub>4</sub>, TCE, and PCE represent chloroform, carbon tetrachloride, trichloroethylene, and perchloroethylene, respectively.
2. ND denotes non-detected.
